# Supplementary material
Source: publisher site journal article supplement (https://en-cdn.bio-protocol.org/attached/file/20200902/3756%20Supplementary%20table%20S2.docx)
Supplement: Supplementary file 1 [file 3756%20Supplementary%20table%20S2.docx]

Etho Application Mode: **Peptide**

**Supplementary table 2:** An example of DI-MS acquisition method optimized for Orbitrap Fusion Tribrid (Thermo Scientific) with Instrument Control Software 3.0

Method Duration (min): **1**

Global Parameters

Ion Source

Ion Source Type: **NSI**

Spray Voltage: **Static**

Positive Ion (V): **0**

Negative Ion (V): **600**

Sweep Gas (Arb): **0**

Ion Transfer Tube Temp (°C): **170**

Use Ion Source Settings from Tune: **False**

FAIMS Mode: **Not Installed**

MS Global Settings

Infusion Mode: **Liquid Chromatography**

Expected LC Peak Width (s): **30**

Default Charge State: **1**

Internal Mass Calibration: **Off**

Experiment#1 [tSIM]

Start Time (min): **0**

End Time (min): **1**

Master Scan:

tSIM

Multiplex Ions: **True**

Maximum Number of Multiplexed Ions: **10**

Define Multiplexing Groups (MSX ID): **User-defined**

Isolation Mode: **Quadrupole**

Isolation Window (m/z): **1.2**

Detector Type: **Orbitrap**

Orbitrap Resolution: **240000**

Mass Range: **Normal**

RF Lens (%): **60**

AGC Target: **Standard**

Maximum Injection Time Mode: **Dynamic**

Desired minimum points across the peak: **1**

Microscans: **1**

Data Type: **Centroid**

Polarity: **Positive**

Source Fragmentation: **Disabled**

Scan Description:

Include Start/End Times: **False**

Mass List Table

| Mass List Table | | | | | |
| --- | --- | --- | --- | --- | --- |
| Compound | Formula | Adduct | m/z | z | MSX ID |
|  |  |  | 915.8311 | 2 | 1 |
|  |  |  | 429.7433 | 2 | 1 |
|  |  |  | 902.2712 | 2 | 1 |
|  |  |  | 909.279 | 2 | 1 |
|  |  |  | 926.5435 | 2 | 1 |
|  |  |  | 522.2804 | 2 | 1 |
|  |  |  | 512.9487 | 2 | 1 |
|  |  |  | 517.6206 | 2 | 1 |
|  |  |  | 561.9636 | 2 | 2 |
|  |  |  | 552.632 | 2 | 2 |
|  |  |  | 837.7227 | 2 | 2 |
|  |  |  | 913.2778 | 2 | 2 |
|  |  |  | 939.7691 | 2 | 2 |
|  |  |  | 881.8144 | 2 | 2 |
|  |  |  | 900.8215 | 2 | 2 |
|  |  |  | 405.2301 | 2 | 2 |
|  |  |  | 419.2334 | 2 | 2 |
|  |  |  | 533.2764 | 2 | 3 |
|  |  |  | 551.9601 | 2 | 3 |
|  |  |  | 557.2917 | 2 | 3 |
|  |  |  | 713.9081 | 2 | 3 |
|  |  |  | 896.7475 | 2 | 3 |
|  |  |  | 476.2303 | 2 | 3 |
|  |  |  | 451.7277 | 2 | 3 |
|  |  |  | 681.0395 | 2 | 3 |
|  |  |  | 905.7751 | 2 | 3 |
|  |  |  | 544.6459 | 2 | 4 |
|  |  |  | 660.8798 | 2 | 4 |
|  |  |  | 357.7222 | 2 | 4 |
|  |  |  | 448.2172 | 2 | 4 |
|  |  |  | 685.0516 | 2 | 4 |
|  |  |  | 675.7078 | 2 | 4 |
|  |  |  | 671.036 | 2 | 4 |
|  |  |  | 690.3833 | 2 | 4 |
|  |  |  | 379.7297 | 2 | 4 |
|  |  |  | 407.7428 | 2 | 4 |
|  |  |  | 547.2738 | 2 | 5 |
|  |  |  | 530.6423 | 2 | 5 |
|  |  |  | 639.8745 | 2 | 5 |
|  |  |  | 689.3724 | 2 | 5 |
|  |  |  | 400.5581 | 2 | 5 |
|  |  |  | 440.2197 | 2 | 5 |
|  |  |  | 680.3797 | 2 | 5 |
|  |  |  | 695.0551 | 2 | 5 |
|  |  |  | 414.7506 | 2 | 5 |
|  |  |  | 629.3694 | 2 | 5 |
|  |  |  | 366.7219 | 2 | 6 |
|  |  |  | 373.7297 | 2 | 6 |
|  |  |  | 563.8509 | 2 | 6 |
|  |  |  | 540.2842 | 2 | 6 |
|  |  |  | 526.2685 | 2 | 6 |
|  |  |  | 719.91 | 2 | 6 |
|  |  |  | 891.8179 | 2 | 6 |
|  |  |  | 479.7408 | 2 | 6 |
|  |  |  | 436.7512 | 2 | 6 |
|  |  |  | 430.2353 | 2 | 6 |
|  |  |  | 387.7272 | 2 | 7 |
|  |  |  | 556.843 | 2 | 7 |
|  |  |  | 543.9861 | 2 | 7 |
|  |  |  | 520.651 | 2 | 7 |
|  |  |  | 646.8824 | 2 | 7 |
|  |  |  | 682.3645 | 2 | 7 |
|  |  |  | 726.9178 | 2 | 7 |
|  |  |  | 279.2104 | 2 | 7 |
|  |  |  | 468.2328 | 2 | 7 |
|  |  |  | 458.7355 | 2 | 7 |
|  |  |  | 554.2816 | 2 | 8 |
|  |  |  | 534.6423 | 2 | 8 |
|  |  |  | 539.3142 | 2 | 8 |
|  |  |  | 515.9791 | 2 | 8 |
|  |  |  | 521.3107 | 2 | 8 |
|  |  |  | 286.2 | 2 | 8 |
|  |  |  | 293.2079 | 2 | 8 |
|  |  |  | 443.2488 | 2 | 8 |
|  |  |  | 464.2723 | 2 | 8 |
|  |  |  | 699.727 | 2 | 8 |
|  |  |  | 542.8274 | 2 | 9 |
|  |  |  | 535.8196 | 2 | 9 |
|  |  |  | 514.2985 | 2 | 9 |
|  |  |  | 529.9826 | 2 | 9 |
|  |  |  | 703.3698 | 2 | 9 |
|  |  |  | 733.9256 | 2 | 9 |
|  |  |  | 455.225 | 2 | 9 |
|  |  |  | 450.2566 | 2 | 9 |
|  |  |  | 471.2801 | 2 | 9 |
|  |  |  | 478.2879 | 2 | 9 |
|  |  |  | 507.2906 | 2 | 10 |
|  |  |  | 493.2932 | 2 | 10 |
|  |  |  | 500.301 | 2 | 10 |
|  |  |  | 486.2854 | 2 | 10 |
|  |  |  | 525.3107 | 2 | 10 |
|  |  |  | 653.872 | 2 | 10 |
|  |  |  | 696.362 | 2 | 10 |
|  |  |  | 364.73 | 2 | 10 |
|  |  |  | 393.7453 | 2 | 10 |
|  |  |  | 386.7375 | 2 | 10 |
|  |  |  | 380.7193 | 2 | 11 |
|  |  |  | 549.8352 | 2 | 11 |
|  |  |  | 720.9159 | 2 | 11 |
|  |  |  | 747.9413 | 2 | 11 |
|  |  |  | 740.9334 | 2 | 11 |
|  |  |  | 272.2026 | 2 | 11 |
|  |  |  | 447.2275 | 2 | 11 |
|  |  |  | 457.2644 | 2 | 11 |
|  |  |  | 437.2432 | 2 | 11 |
|  |  |  | 425.7666 | 2 | 11 |

Experiment#2 [tMSn]

Start Time (min): **0**

End Time (min): **1**

Master Scan:

tMS² OT HCD

MSⁿ Level (n): **2**

Multiplex Ions: **False**

Isolation Mode: **Quadrupole**

Isolation Window (m/z): **0.7**

Activation Type: **HCD**

HCD Collision Energy (%): **30**

Stepped Collision Energy: **False**

Detector Type: **Orbitrap**

Orbitrap Resolution: **120000**

Mass Range: **Normal**

Scan Range Mode: **Define m/z range**

Scan Range (m/z): **170-1200**

RF Lens (%): **60**

AGC Target: **Custom**

Normalized AGC Target (%): **200**

Maximum Injection Time Mode: **Dynamic**

Desired minimum points across the peak: **6**

Microscans: **1**

Data Type: **Centroid**

Polarity: **Positive**

Source Fragmentation: **Disabled**

Use EASY-IC™: **False**

Dynamic Retention Time: **Off**

Scan Description: **K9ac-K14ac**

Include Start/End Times: **False**

Mass List Table

| Mass List Table | | | | |
| --- | --- | --- | --- | --- |
| Compound | Formula | Adduct | m/z | z |
|  |  |  | 500.2828 | 2 |

Experiment#3 [tMSn]

Start Time (min): **0**

End Time (min): **1**

Master Scan:

tMS² OT HCD

MSⁿ Level (n): **2**

Multiplex Ions: **False**

Isolation Mode: **Quadrupole**

Isolation Window (m/z): **0.7**

Activation Type: **HCD**

HCD Collision Energy (%): **30**

Stepped Collision Energy: **False**

Detector Type: **Orbitrap**

Orbitrap Resolution: **120000**

Mass Range: **Normal**

Scan Range Mode: **Define m/z range**

Scan Range (m/z): **170-1200**

RF Lens (%): **60**

AGC Target: **Custom**

Normalized AGC Target (%): **200**

Maximum Injection Time Mode: **Dynamic**

Desired minimum points across the peak: **6**

Microscans: **1**

Data Type: **Centroid**

Polarity: **Positive**

Source Fragmentation: **Disabled**

Use EASY-IC™: **False**

Dynamic Retention Time: **Off**

Scan Description: **unmod-K9me1K14ac**

Include Start/End Times: **False**

Mass List Table

| Mass List Table | | | | |
| --- | --- | --- | --- | --- |
| Compound | Formula | Adduct | m/z | z |
|  |  |  | 507.2906 | 2 |

Experiment#4 [tMSn]

Start Time (min): **0**

End Time (min): **1**

Master Scan:

tMS² OT HCD

MSⁿ Level (n): **2**

Multiplex Ions: **False**

Isolation Mode: **Quadrupole**

Isolation Window (m/z): **0.7**

Activation Type: **HCD**

HCD Collision Energy (%): **30**

Stepped Collision Energy: **False**

Detector Type: **Orbitrap**

Orbitrap Resolution: **120000**

Mass Range: **Normal**

Scan Range Mode: **Define m/z range**

Scan Range (m/z): **170-1200**

RF Lens (%): **60**

AGC Target: **Custom**

Normalized AGC Target (%): **200**

Maximum Injection Time Mode: **Dynamic**

Desired minimum points across the peak: **6**

Microscans: **1**

Data Type: **Centroid**

Polarity: **Positive**

Source Fragmentation: **Disabled**

Use EASY-IC™: **False**

Dynamic Retention Time: **Off**

Scan Description: **K9me2-K9me3K14ac**

Include Start/End Times: **False**

Mass List Table

| Mass List Table | | | | |
| --- | --- | --- | --- | --- |
| Compound | Formula | Adduct | m/z | z |
|  |  |  | 493.2932 | 2 |

Experiment#5 [tMSn]

Start Time (min): **0**

End Time (min): **1**

Master Scan:

tMS² OT HCD

MSⁿ Level (n): **2**

Multiplex Ions: **False**

Isolation Mode: **Quadrupole**

Isolation Window (m/z): **0.7**

Activation Type: **HCD**

HCD Collision Energy (%): **30**

Stepped Collision Energy: **False**

Detector Type: **Orbitrap**

Orbitrap Resolution: **120000**

Mass Range: **Normal**

Scan Range Mode: **Define m/z range**

Scan Range (m/z): **170-1200**

RF Lens (%): **60**

AGC Target: **Custom**

Normalized AGC Target (%): **200**

Maximum Injection Time Mode: **Dynamic**

Desired minimum points across the peak: **6**

Microscans: **1**

Data Type: **Centroid**

Polarity: **Positive**

Source Fragmentation: **Disabled**

Use EASY-IC™: **False**

Dynamic Retention Time: **Off**

Scan Description: **K18ac-K23ac**

Include Start/End Times: **False**

Mass List Table

| Mass List Table | | | | |
| --- | --- | --- | --- | --- |
| Compound | Formula | Adduct | m/z | z |
|  |  |  | 542.8274 | 2 |

Experiment#6 [tMSn]

Start Time (min): **0**

End Time (min): **1**

Master Scan:

tMS² OT HCD

MSⁿ Level (n): **2**

Multiplex Ions: **False**

Isolation Mode: **Quadrupole**

Isolation Window (m/z): **0.7**

Activation Type: **HCD**

HCD Collision Energy (%): **30**

Stepped Collision Energy: **False**

Detector Type: **Orbitrap**

Orbitrap Resolution: **120000**

Mass Range: **Normal**

Scan Range Mode: **Define m/z range**

Scan Range (m/z): **170-1200**

RF Lens (%): **60**

AGC Target: **Custom**

Normalized AGC Target (%): **200**

Maximum Injection Time Mode: **Dynamic**

Desired minimum points across the peak: **6**

Microscans: **1**

Data Type: **Centroid**

Polarity: **Positive**

Source Fragmentation: **Disabled**

Use EASY-IC™: **False**

Dynamic Retention Time: **Off**

Scan Description: **K18me1-K23me1**

Include Start/End Times: **False**

Mass List Table

| Mass List Table | | | | |
| --- | --- | --- | --- | --- |
| Compound | Formula | Adduct | m/z | z |
|  |  |  | 556.843 | 2 |

Experiment#7 [tMSn]

Start Time (min): **0**

End Time (min): **1**

Master Scan:

tMS² OT HCD

MSⁿ Level (n): **2**

Multiplex Ions: **False**

Isolation Mode: **Quadrupole**

Isolation Window (m/z): **0.7**

Activation Type: **HCD**

HCD Collision Energy (%): **30**

Stepped Collision Energy: **False**

Detector Type: **Orbitrap**

Orbitrap Resolution: **120000**

Mass Range: **Normal**

Scan Range Mode: **Define m/z range**

Scan Range (m/z): **170-1200**

RF Lens (%): **60**

AGC Target: **Custom**

Normalized AGC Target (%): **200**

Maximum Injection Time Mode: **Dynamic**

Desired minimum points across the peak: **6**

Microscans: **1**

Data Type: **Centroid**

Polarity: **Positive**

Source Fragmentation: **Disabled**

Use EASY-IC™: **False**

Dynamic Retention Time: **Off**

Scan Description: **K27me1-K36me1**

Include Start/End Times: **False**

Mass List Table

| Mass List Table | | | | |
| --- | --- | --- | --- | --- |
| Compound | Formula | Adduct | m/z | z |
|  |  |  | 539.3142 | 3 |

Experiment#8 [tMSn]

Start Time (min): **0**

End Time (min): **1**

Master Scan:

tMS² OT HCD

MSⁿ Level (n): **2**

Multiplex Ions: **False**

Isolation Mode: **Quadrupole**

Isolation Window (m/z): **0.7**

Activation Type: **HCD**

HCD Collision Energy (%): **30**

Stepped Collision Energy: **False**

Detector Type: **Orbitrap**

Orbitrap Resolution: **120000**

Mass Range: **Normal**

Scan Range Mode: **Define m/z range**

Scan Range (m/z): **170-1200**

RF Lens (%): **60**

AGC Target: **Custom**

Normalized AGC Target (%): **200**

Maximum Injection Time Mode: **Dynamic**

Desired minimum points across the peak: **6**

Microscans: **1**

Data Type: **Centroid**

Polarity: **Positive**

Source Fragmentation: **Disabled**

Use EASY-IC™: **False**

Dynamic Retention Time: **Off**

Scan Description: **K27me2-K36me2**

Include Start/End Times: **False**

Mass List Table

| Mass List Table | | | | |
| --- | --- | --- | --- | --- |
| Compound | Formula | Adduct | m/z | z |
|  |  |  | 525.3107 | 3 |

Experiment#9 [tMSn]

Start Time (min): **0**

End Time (min): **1**

Master Scan:

tMS² OT HCD

MSⁿ Level (n): **2**

Multiplex Ions: **False**

Isolation Mode: **Quadrupole**

Isolation Window (m/z): **0.7**

Activation Type: **HCD**

HCD Collision Energy (%): **30**

Stepped Collision Energy: **False**

Detector Type: **Orbitrap**

Orbitrap Resolution: **120000**

Mass Range: **Normal**

Scan Range Mode: **Define m/z range**

Scan Range (m/z): **170-1200**

RF Lens (%): **60**

AGC Target: **Custom**

Normalized AGC Target (%): **200**

Maximum Injection Time Mode: **Dynamic**

Desired minimum points across the peak: **6**

Microscans: **1**

Data Type: **Centroid**

Polarity: **Positive**

Source Fragmentation: **Disabled**

Use EASY-IC™: **False**

Dynamic Retention Time: **Off**

Scan Description: **3methyls**

Include Start/End Times: **False**

Mass List Table

| Mass List Table | | | | |
| --- | --- | --- | --- | --- |
| Compound | Formula | Adduct | m/z | z |
|  |  |  | 529.9826 | 3 |

Experiment#10 [tMSn]

Start Time (min): **0**

End Time (min): **1**

Master Scan:

tMS² OT HCD

MSⁿ Level (n): **2**

Multiplex Ions: **False**

Isolation Mode: **Quadrupole**

Isolation Window (m/z): **0.7**

Activation Type: **HCD**

HCD Collision Energy (%): **30**

Stepped Collision Energy: **False**

Detector Type: **Orbitrap**

Orbitrap Resolution: **120000**

Mass Range: **Normal**

Scan Range Mode: **Define m/z range**

Scan Range (m/z): **170-1200**

RF Lens (%): **60**

AGC Target: **Custom**

Normalized AGC Target (%): **200**

Maximum Injection Time Mode: **Dynamic**

Desired minimum points across the peak: **6**

Microscans: **1**

Data Type: **Centroid**

Polarity: **Positive**

Source Fragmentation: **Disabled**

Use EASY-IC™: **False**

Dynamic Retention Time: **Off**

Scan Description: **4methyl mono-tri**

Include Start/End Times: **False**

Mass List Table

| Mass List Table | | | | |
| --- | --- | --- | --- | --- |
| Compound | Formula | Adduct | m/z | z |
|  |  |  | 534.6423 | 3 |

Experiment#11 [tMSn]

Start Time (min): **0**

End Time (min): **1**

Master Scan:

tMS² OT HCD

MSⁿ Level (n): **2**

Multiplex Ions: **False**

Isolation Mode: **Quadrupole**

Isolation Window (m/z): **0.7**

Activation Type: **HCD**

HCD Collision Energy (%): **30**

Stepped Collision Energy: **False**

Detector Type: **Orbitrap**

Orbitrap Resolution: **120000**

Mass Range: **Normal**

Scan Range Mode: **Define m/z range**

Scan Range (m/z): **170-1200**

RF Lens (%): **60**

AGC Target: **Custom**

Normalized AGC Target (%): **200**

Maximum Injection Time Mode: **Dynamic**

Desired minimum points across the peak: **6**

Microscans: **1**

Data Type: **Centroid**

Polarity: **Positive**

Source Fragmentation: **Disabled**

Use EASY-IC™: **False**

Dynamic Retention Time: **Off**

Scan Description: **H3.3 27me1-36me1**

Include Start/End Times: **False**

Mass List Table

| Mass List Table | | | | |
| --- | --- | --- | --- | --- |
| Compound | Formula | Adduct | m/z | z |
|  |  |  | 544.7459 | 3 |

Experiment#12 [tMSn]

Start Time (min): **0**

End Time (min): **1**

Master Scan:

tMS² OT HCD

MSⁿ Level (n): **2**

Multiplex Ions: **False**

Isolation Mode: **Quadrupole**

Isolation Window (m/z): **0.7**

Activation Type: **HCD**

HCD Collision Energy (%): **30**

Stepped Collision Energy: **False**

Detector Type: **Orbitrap**

Orbitrap Resolution: **120000**

Mass Range: **Normal**

Scan Range Mode: **Define m/z range**

Scan Range (m/z): **170-1200**

RF Lens (%): **60**

AGC Target: **Custom**

Normalized AGC Target (%): **200**

Maximum Injection Time Mode: **Dynamic**

Desired minimum points across the peak: **6**

Microscans: **1**

Data Type: **Centroid**

Polarity: **Positive**

Source Fragmentation: **Disabled**

Use EASY-IC™: **False**

Dynamic Retention Time: **Off**

Scan Description: **H3.3 27me2-36me2**

Include Start/End Times: **False**

Mass List Table

| Mass List Table | | | | |
| --- | --- | --- | --- | --- |
| Compound | Formula | Adduct | m/z | z |
|  |  |  | 530.8423 | 3 |

Experiment#13 [tMSn]

Start Time (min): **0**

End Time (min): **1**

Master Scan:

tMS² OT HCD

MSⁿ Level (n): **2**

Multiplex Ions: **False**

Isolation Mode: **Quadrupole**

Isolation Window (m/z): **0.7**

Activation Type: **HCD**

HCD Collision Energy (%): **30**

Stepped Collision Energy: **False**

Detector Type: **Orbitrap**

Orbitrap Resolution: **120000**

Mass Range: **Normal**

Scan Range Mode: **Define m/z range**

Scan Range (m/z): **170-1200**

RF Lens (%): **60**

AGC Target: **Custom**

Normalized AGC Target (%): **200**

Maximum Injection Time Mode: **Dynamic**

Desired minimum points across the peak: **6**

Microscans: **1**

Data Type: **Centroid**

Polarity: **Positive**

Source Fragmentation: **Disabled**

Use EASY-IC™: **False**

Dynamic Retention Time: **Off**

Scan Description: **H3.3 3methyls**

Include Start/End Times: **False**

Mass List Table

| Mass List Table | | | | |
| --- | --- | --- | --- | --- |
| Compound | Formula | Adduct | m/z | z |
|  |  |  | 535.5142 | 3 |

Experiment#14 [tMSn]

Start Time (min): **0**

End Time (min): **1**

Master Scan:

tMS² OT HCD

MSⁿ Level (n): **2**

Multiplex Ions: **False**

Isolation Mode: **Quadrupole**

Isolation Window (m/z): **0.7**

Activation Type: **HCD**

HCD Collision Energy (%): **30**

Stepped Collision Energy: **False**

Detector Type: **Orbitrap**

Orbitrap Resolution: **120000**

Mass Range: **Normal**

Scan Range Mode: **Define m/z range**

Scan Range (m/z): **170-1200**

RF Lens (%): **60**

AGC Target: **Custom**

Normalized AGC Target (%): **200**

Maximum Injection Time Mode: **Dynamic**

Desired minimum points across the peak: **6**

Microscans: **1**

Data Type: **Centroid**

Polarity: **Positive**

Source Fragmentation: **Disabled**

Use EASY-IC™: **False**

Dynamic Retention Time: **Off**

Scan Description: **H3.3 4methyls**

Include Start/End Times: **False**

Mass List Table

| Mass List Table | | | | |
| --- | --- | --- | --- | --- |
| Compound | Formula | Adduct | m/z | z |
|  |  |  | 540.1861 | 3 |

Experiment#15 [tMSn]

Start Time (min): **0**

End Time (min): **1**

Master Scan:

tMS² OT HCD

MSⁿ Level (n): **2**

Multiplex Ions: **False**

Isolation Mode: **Quadrupole**

Isolation Window (m/z): **0.7**

Activation Type: **HCD**

HCD Collision Energy (%): **30**

Stepped Collision Energy: **False**

Detector Type: **Orbitrap**

Orbitrap Resolution: **120000**

Mass Range: **Normal**

Scan Range Mode: **Define m/z range**

Scan Range (m/z): **170-1500**

RF Lens (%): **60**

AGC Target: **Custom**

Normalized AGC Target (%): **200**

Maximum Injection Time Mode: **Dynamic**

Desired minimum points across the peak: **6**

Microscans: **1**

Data Type: **Centroid**

Polarity: **Positive**

Source Fragmentation: **Disabled**

Use EASY-IC™: **False**

Dynamic Retention Time: **Off**

Scan Description: **H4 1ac**

Include Start/End Times: **False**

Mass List Table

| Mass List Table | | | | |
| --- | --- | --- | --- | --- |
| Compound | Formula | Adduct | m/z | z |
|  |  |  | 740.9334 | 2 |

Experiment#16 [tMSn]

Start Time (min): **0**

End Time (min): **1**

Master Scan:

tMS² OT HCD

MSⁿ Level (n): **2**

Multiplex Ions: **False**

Isolation Mode: **Quadrupole**

Isolation Window (m/z): **0.7**

Activation Type: **HCD**

HCD Collision Energy (%): **30**

Stepped Collision Energy: **False**

Detector Type: **Orbitrap**

Orbitrap Resolution: **120000**

Mass Range: **Normal**

Scan Range Mode: **Define m/z range**

Scan Range (m/z): **170-1500**

RF Lens (%): **60**

AGC Target: **Custom**

Normalized AGC Target (%): **200**

Maximum Injection Time Mode: **Dynamic**

Desired minimum points across the peak: **6**

Microscans: **1**

Data Type: **Centroid**

Polarity: **Positive**

Source Fragmentation: **Disabled**

Use EASY-IC™: **False**

Dynamic Retention Time: **Off**

Scan Description: **H4 2ac**

Include Start/End Times: **False**

Mass List Table

| Mass List Table | | | | |
| --- | --- | --- | --- | --- |
| Compound | Formula | Adduct | m/z | z |
|  |  |  | 733.9256 | 2 |

Experiment#17 [tMSn]

Start Time (min): **0**

End Time (min): **1**

Master Scan:

tMS² OT HCD

MSⁿ Level (n): **2**

Multiplex Ions: **False**

Isolation Mode: **Quadrupole**

Isolation Window (m/z): **0.7**

Activation Type: **HCD**

HCD Collision Energy (%): **30**

Stepped Collision Energy: **False**

Detector Type: **Orbitrap**

Orbitrap Resolution: **120000**

Mass Range: **Normal**

Scan Range Mode: **Define m/z range**

Scan Range (m/z): **170-1500**

RF Lens (%): **60**

AGC Target: **Custom**

Normalized AGC Target (%): **200**

Maximum Injection Time Mode: **Dynamic**

Desired minimum points across the peak: **6**

Microscans: **1**

Data Type: **Centroid**

Polarity: **Positive**

Source Fragmentation: **Disabled**

Use EASY-IC™: **False**

Dynamic Retention Time: **Off**

Scan Description: **H4 3ac**

Include Start/End Times: **False**

Mass List Table

| Mass List Table | | | | |
| --- | --- | --- | --- | --- |
| Compound | Formula | Adduct | m/z | z |
|  |  |  | 726.9178 | 2 |

Experiment#18 [tMSn]

Start Time (min): **0**

End Time (min): **1**

Master Scan:

tMS² OT HCD

MSⁿ Level (n): **2**

Multiplex Ions: **False**

Isolation Mode: **Quadrupole**

Isolation Window (m/z): **0.7**

Activation Type: **HCD**

HCD Collision Energy (%): **30**

Stepped Collision Energy: **False**

Detector Type: **Orbitrap**

Orbitrap Resolution: **120000**

Mass Range: **Normal**

Scan Range Mode: **Define m/z range**

Scan Range (m/z): **170-1200**

RF Lens (%): **60**

AGC Target: **Custom**

Normalized AGC Target (%): **200**

Maximum Injection Time Mode: **Dynamic**

Desired minimum points across the peak: **6**

Microscans: **1**

Data Type: **Centroid**

Polarity: **Positive**

Source Fragmentation: **Disabled**

Use EASY-IC™: **False**

Dynamic Retention Time: **Off**

Scan Description: **H2A1 K5ac-K9ac**

Include Start/End Times: **False**

Mass List Table

| Mass List Table | | | | |
| --- | --- | --- | --- | --- |
| Compound | Formula | Adduct | m/z | z |
|  |  |  | 450.2566 | 2 |

Experiment#19 [tMSn]

Start Time (min): **0**

End Time (min): **1**

Master Scan:

tMS² OT HCD

MSⁿ Level (n): **2**

Multiplex Ions: **False**

Isolation Mode: **Quadrupole**

Isolation Window (m/z): **0.7**

Activation Type: **HCD**

HCD Collision Energy (%): **30**

Stepped Collision Energy: **False**

Detector Type: **Orbitrap**

Orbitrap Resolution: **120000**

Mass Range: **Normal**

Scan Range Mode: **Define m/z range**

Scan Range (m/z): **170-1200**

RF Lens (%): **60**

AGC Target: **Custom**

Normalized AGC Target (%): **200**

Maximum Injection Time Mode: **Dynamic**

Desired minimum points across the peak: **6**

Microscans: **1**

Data Type: **Centroid**

Polarity: **Positive**

Source Fragmentation: **Disabled**

Use EASY-IC™: **False**

Dynamic Retention Time: **Off**

Scan Description: **H2A1-J me1-ac**

Include Start/End Times: **False**

Mass List Table

| Mass List Table | | | | |
| --- | --- | --- | --- | --- |
| Compound | Formula | Adduct | m/z | z |
|  |  |  | 464.2723 | 2 |

Experiment#20 [tMSn]

Start Time (min): **0**

End Time (min): **1**

Master Scan:

tMS² OT HCD

MSⁿ Level (n): **2**

Multiplex Ions: **False**

Isolation Mode: **Quadrupole**

Isolation Window (m/z): **0.7**

Activation Type: **HCD**

HCD Collision Energy (%): **30**

Stepped Collision Energy: **False**

Detector Type: **Orbitrap**

Orbitrap Resolution: **120000**

Mass Range: **Normal**

Scan Range Mode: **Define m/z range**

Scan Range (m/z): **170-1200**

RF Lens (%): **60**

AGC Target: **Custom**

Normalized AGC Target (%): **200**

Maximum Injection Time Mode: **Dynamic**

Desired minimum points across the peak: **6**

Microscans: **1**

Data Type: **Centroid**

Polarity: **Positive**

Source Fragmentation: **Disabled**

Use EASY-IC™: **False**

Dynamic Retention Time: **Off**

Scan Description: **H2AJ K5me1-K9me1**

Include Start/End Times: **False**

Mass List Table

| Mass List Table | | | | |
| --- | --- | --- | --- | --- |
| Compound | Formula | Adduct | m/z | z |
|  |  |  | 478.2879 | 2 |

Experiment#21 [tMSn]

Start Time (min): **0**

End Time (min): **1**

Master Scan:

tMS² OT HCD

MSⁿ Level (n): **2**

Multiplex Ions: **False**

Isolation Mode: **Quadrupole**

Isolation Window (m/z): **0.7**

Activation Type: **HCD**

HCD Collision Energy (%): **30**

Stepped Collision Energy: **False**

Detector Type: **Orbitrap**

Orbitrap Resolution: **120000**

Mass Range: **Normal**

Scan Range Mode: **Define m/z range**

Scan Range (m/z): **170-1200**

RF Lens (%): **60**

AGC Target: **Custom**

Normalized AGC Target (%): **200**

Maximum Injection Time Mode: **Dynamic**

Desired minimum points across the peak: **6**

Microscans: **1**

Data Type: **Centroid**

Polarity: **Positive**

Source Fragmentation: **Disabled**

Use EASY-IC™: **False**

Dynamic Retention Time: **Off**

Scan Description: **H2AX K5ac-K9ac**

Include Start/End Times: **False**

Mass List Table

| Mass List Table | | | | |
| --- | --- | --- | --- | --- |
| Compound | Formula | Adduct | m/z | z |
|  |  |  | 436.7512 | 2 |

Experiment#22 [tMSn]

Start Time (min): **0**

End Time (min): **1**

Master Scan:

tMS² OT HCD

MSⁿ Level (n): **2**

Multiplex Ions: **False**

Isolation Mode: **Quadrupole**

Isolation Window (m/z): **0.7**

Activation Type: **HCD**

HCD Collision Energy (%): **30**

Stepped Collision Energy: **False**

Detector Type: **Orbitrap**

Orbitrap Resolution: **120000**

Mass Range: **Normal**

Scan Range Mode: **Define m/z range**

Scan Range (m/z): **170-1200**

RF Lens (%): **60**

AGC Target: **Custom**

Normalized AGC Target (%): **200**

Maximum Injection Time Mode: **Dynamic**

Desired minimum points across the peak: **6**

Microscans: **1**

Data Type: **Centroid**

Polarity: **Positive**

Source Fragmentation: **Disabled**

Use EASY-IC™: **False**

Dynamic Retention Time: **Off**

Scan Description: **H2AX K5me1-K9me1**

Include Start/End Times: **False**

Mass List Table

| Mass List Table | | | | |
| --- | --- | --- | --- | --- |
| Compound | Formula | Adduct | m/z | z |
|  |  |  | 450.7668 | 2 |

Experiment#23 [tMSn]

Start Time (min): **0**

End Time (min): **1**

Master Scan:

tMS² OT HCD

MSⁿ Level (n): **2**

Multiplex Ions: **False**

Isolation Mode: **Quadrupole**

Isolation Window (m/z): **0.7**

Activation Type: **HCD**

HCD Collision Energy (%): **30**

Stepped Collision Energy: **False**

Detector Type: **Orbitrap**

Orbitrap Resolution: **120000**

Mass Range: **Normal**

Scan Range Mode: **Define m/z range**

Scan Range (m/z): **170-1500**

RF Lens (%): **60**

AGC Target: **Custom**

Normalized AGC Target (%): **200**

Maximum Injection Time Mode: **Dynamic**

Desired minimum points across the peak: **6**

Microscans: **1**

Data Type: **Centroid**

Polarity: **Positive**

Source Fragmentation: **Disabled**

Use EASY-IC™: **False**

Dynamic Retention Time: **Off**

Scan Description: **H2AV 1ac**

Include Start/End Times: **False**

Mass List Table

| Mass List Table | | | | |
| --- | --- | --- | --- | --- |
| Compound | Formula | Adduct | m/z | z |
|  |  |  | 685.0516 | 2 |

Experiment#24 [tMSn]

Start Time (min): **0**

End Time (min): **1**

Master Scan:

tMS² OT HCD

MSⁿ Level (n): **2**

Multiplex Ions: **False**

Isolation Mode: **Quadrupole**

Isolation Window (m/z): **0.7**

Activation Type: **HCD**

HCD Collision Energy (%): **30**

Stepped Collision Energy: **False**

Detector Type: **Orbitrap**

Orbitrap Resolution: **120000**

Mass Range: **Normal**

Scan Range Mode: **Define m/z range**

Scan Range (m/z): **170-1500**

RF Lens (%): **60**

AGC Target: **Custom**

Normalized AGC Target (%): **200**

Maximum Injection Time Mode: **Dynamic**

Desired minimum points across the peak: **6**

Microscans: **1**

Data Type: **Centroid**

Polarity: **Positive**

Source Fragmentation: **Disabled**

Use EASY-IC™: **False**

Dynamic Retention Time: **Off**

Scan Description: **H2AV 2ac**

Include Start/End Times: **False**

Mass List Table

| Mass List Table | | | | |
| --- | --- | --- | --- | --- |
| Compound | Formula | Adduct | m/z | z |
|  |  |  | 680.3797 | 2 |

Experiment#25 [tMSn]

Start Time (min): **0**

End Time (min): **1**

Master Scan:

tMS² OT HCD

MSⁿ Level (n): **2**

Multiplex Ions: **False**

Isolation Mode: **Quadrupole**

Isolation Window (m/z): **0.7**

Activation Type: **HCD**

HCD Collision Energy (%): **30**

Stepped Collision Energy: **False**

Detector Type: **Orbitrap**

Orbitrap Resolution: **120000**

Mass Range: **Normal**

Scan Range Mode: **Define m/z range**

Scan Range (m/z): **170-1500**

RF Lens (%): **60**

AGC Target: **Custom**

Normalized AGC Target (%): **200**

Maximum Injection Time Mode: **Dynamic**

Desired minimum points across the peak: **6**

Microscans: **1**

Data Type: **Centroid**

Polarity: **Positive**

Source Fragmentation: **Disabled**

Use EASY-IC™: **False**

Dynamic Retention Time: **Off**

Scan Description: **H2AV 3ac**

Include Start/End Times: **False**

Mass List Table

| Mass List Table | | | | |
| --- | --- | --- | --- | --- |
| Compound | Formula | Adduct | m/z | z |
|  |  |  | 675.7078 | 2 |

Experiment#26 [tMSn]

Start Time (min): **0**

End Time (min): **1**

Master Scan:

tMS² OT HCD

MSⁿ Level (n): **2**

Multiplex Ions: **False**

Isolation Mode: **Quadrupole**

Isolation Window (m/z): **0.7**

Activation Type: **HCD**

HCD Collision Energy (%): **30**

Stepped Collision Energy: **False**

Detector Type: **Orbitrap**

Orbitrap Resolution: **120000**

Mass Range: **Normal**

Scan Range Mode: **Define m/z range**

Scan Range (m/z): **170-1500**

RF Lens (%): **60**

AGC Target: **Custom**

Normalized AGC Target (%): **200**

Maximum Injection Time Mode: **Dynamic**

Desired minimum points across the peak: **6**

Microscans: **1**

Data Type: **Centroid**

Polarity: **Positive**

Source Fragmentation: **Disabled**

Use EASY-IC™: **False**

Dynamic Retention Time: **Off**

Scan Description: **H2AZ 1ac**

Include Start/End Times: **False**

Mass List Table

| Mass List Table | | | | |
| --- | --- | --- | --- | --- |
| Compound | Formula | Adduct | m/z | z |
|  |  |  | 695.0551 | 2 |

Experiment#27 [tMSn]

Start Time (min): **0**

End Time (min): **1**

Master Scan:

tMS² OT HCD

MSⁿ Level (n): **2**

Multiplex Ions: **False**

Isolation Mode: **Quadrupole**

Isolation Window (m/z): **0.7**

Activation Type: **HCD**

HCD Collision Energy (%): **30**

Stepped Collision Energy: **False**

Detector Type: **Orbitrap**

Orbitrap Resolution: **120000**

Mass Range: **Normal**

Scan Range Mode: **Define m/z range**

Scan Range (m/z): **170-1500**

RF Lens (%): **60**

AGC Target: **Custom**

Normalized AGC Target (%): **200**

Maximum Injection Time Mode: **Dynamic**

Desired minimum points across the peak: **6**

Microscans: **1**

Data Type: **Centroid**

Polarity: **Positive**

Source Fragmentation: **Disabled**

Use EASY-IC™: **False**

Dynamic Retention Time: **Off**

Scan Description: **H2AZ 2ac**

Include Start/End Times: **False**

Mass List Table

| Mass List Table | | | | |
| --- | --- | --- | --- | --- |
| Compound | Formula | Adduct | m/z | z |
|  |  |  | 690.3833 | 2 |

Experiment#28 [tMSn]

Start Time (min): **0**

End Time (min): **1**

Master Scan:

tMS² OT HCD

MSⁿ Level (n): **2**

Multiplex Ions: **False**

Isolation Mode: **Quadrupole**

Isolation Window (m/z): **0.7**

Activation Type: **HCD**

HCD Collision Energy (%): **30**

Stepped Collision Energy: **False**

Detector Type: **Orbitrap**

Orbitrap Resolution: **120000**

Mass Range: **Normal**

Scan Range Mode: **Define m/z range**

Scan Range (m/z): **170-1500**

RF Lens (%): **60**

AGC Target: **Custom**

Normalized AGC Target (%): **200**

Maximum Injection Time Mode: **Dynamic**

Desired minimum points across the peak: **6**

Microscans: **1**

Data Type: **Centroid**

Polarity: **Positive**

Source Fragmentation: **Disabled**

Use EASY-IC™: **False**

Dynamic Retention Time: **Off**

Scan Description: **H2AZ 3ac**

Include Start/End Times: **False**

Mass List Table

| Mass List Table | | | | |
| --- | --- | --- | --- | --- |
| Compound | Formula | Adduct | m/z | z |
|  |  |  | 685.7114 | 2 |

Experiment#29 [tMSn]

Start Time (min): **0**

End Time (min): **1**

Master Scan:

tMS² OT HCD

MSⁿ Level (n): **2**

Multiplex Ions: **False**

Isolation Mode: **Quadrupole**

Isolation Window (m/z): **0.7**

Activation Type: **HCD**

HCD Collision Energy (%): **30**

Stepped Collision Energy: **False**

Detector Type: **Orbitrap**

Orbitrap Resolution: **120000**

Mass Range: **Normal**

Scan Range Mode: **Define m/z range**

Scan Range (m/z): **170-1200**

RF Lens (%): **60**

AGC Target: **Custom**

Normalized AGC Target (%): **200**

Maximum Injection Time Mode: **Dynamic**

Desired minimum points across the peak: **6**

Microscans: **1**

Data Type: **Centroid**

Polarity: **Positive**

Source Fragmentation: **Disabled**

Use EASY-IC™: **False**

Dynamic Retention Time: **Off**

Scan Description: **H2A1un-H2A3me1**

Include Start/End Times: **False**

Mass List Table

| Mass List Table | | | | |
| --- | --- | --- | --- | --- |
| Compound | Formula | Adduct | m/z | z |
|  |  |  | 393.7453 | 2 |

Experiment#30 [tMSn]

Start Time (min): **0**

End Time (min): **1**

Master Scan:

tMS² OT HCD

MSⁿ Level (n): **2**

Multiplex Ions: **False**

Isolation Mode: **Quadrupole**

Isolation Window (m/z): **0.7**

Activation Type: **HCD**

HCD Collision Energy (%): **30**

Stepped Collision Energy: **False**

Detector Type: **Orbitrap**

Orbitrap Resolution: **120000**

Mass Range: **Normal**

Scan Range Mode: **Define m/z range**

Scan Range (m/z): **170-1200**

RF Lens (%): **60**

AGC Target: **Custom**

Normalized AGC Target (%): **200**

Maximum Injection Time Mode: **Dynamic**

Desired minimum points across the peak: **6**

Microscans: **1**

Data Type: **Centroid**

Polarity: **Positive**

Source Fragmentation: **Disabled**

Use EASY-IC™: **False**

Dynamic Retention Time: **Off**

Scan Description: **H2A1ac-H2A3un**

Include Start/End Times: **False**

Mass List Table

| Mass List Table | | | | |
| --- | --- | --- | --- | --- |
| Compound | Formula | Adduct | m/z | z |
|  |  |  | 386.7375 | 2 |

Experiment#31 [tMSn]

Start Time (min): **0**

End Time (min): **1**

Master Scan:

tMS² OT HCD

MSⁿ Level (n): **2**

Multiplex Ions: **False**

Isolation Mode: **Quadrupole**

Isolation Window (m/z): **0.7**

Activation Type: **HCD**

HCD Collision Energy (%): **30**

Stepped Collision Energy: **False**

Detector Type: **Orbitrap**

Orbitrap Resolution: **120000**

Mass Range: **Normal**

Scan Range Mode: **Define m/z range**

Scan Range (m/z): **170-1200**

RF Lens (%): **60**

AGC Target: **Custom**

Normalized AGC Target (%): **200**

Maximum Injection Time Mode: **Dynamic**

Desired minimum points across the peak: **6**

Microscans: **1**

Data Type: **Centroid**

Polarity: **Positive**

Source Fragmentation: **Disabled**

Use EASY-IC™: **False**

Dynamic Retention Time: **Off**

Scan Description: **H2A1K13m1-K15m1**

Include Start/End Times: **False**

Mass List Table

| Mass List Table | | | | |
| --- | --- | --- | --- | --- |
| Compound | Formula | Adduct | m/z | z |
|  |  |  | 400.7532 | 2 |

Experiment#32 [tMSn]

Start Time (min): **0**

End Time (min): **1**

Master Scan:

tMS² OT HCD

MSⁿ Level (n): **2**

Multiplex Ions: **False**

Isolation Mode: **Quadrupole**

Isolation Window (m/z): **0.7**

Activation Type: **HCD**

HCD Collision Energy (%): **30**

Stepped Collision Energy: **False**

Detector Type: **Orbitrap**

Orbitrap Resolution: **120000**

Mass Range: **Normal**

Scan Range Mode: **Define m/z range**

Scan Range (m/z): **170-1200**

RF Lens (%): **60**

AGC Target: **Custom**

Normalized AGC Target (%): **200**

Maximum Injection Time Mode: **Dynamic**

Desired minimum points across the peak: **6**

Microscans: **1**

Data Type: **Centroid**

Polarity: **Positive**

Source Fragmentation: **Disabled**

Use EASY-IC™: **False**

Dynamic Retention Time: **Off**

Scan Description: **10ph-9m1S10ph14a**

Include Start/End Times: **False**

Mass List Table

| Mass List Table | | | | |
| --- | --- | --- | --- | --- |
| Compound | Formula | Adduct | m/z | z |
|  |  |  | 547.2738 | 2 |

Experiment#33 [tMSn]

Start Time (min): **0**

End Time (min): **1**

Master Scan:

tMS² OT HCD

MSⁿ Level (n): **2**

Multiplex Ions: **False**

Isolation Mode: **Quadrupole**

Isolation Window (m/z): **0.7**

Activation Type: **HCD**

HCD Collision Energy (%): **30**

Stepped Collision Energy: **False**

Detector Type: **Orbitrap**

Orbitrap Resolution: **120000**

Mass Range: **Normal**

Scan Range Mode: **Define m/z range**

Scan Range (m/z): **170-1200**

RF Lens (%): **60**

AGC Target: **Custom**

Normalized AGC Target (%): **200**

Maximum Injection Time Mode: **Dynamic**

Desired minimum points across the peak: **6**

Microscans: **1**

Data Type: **Centroid**

Polarity: **Positive**

Source Fragmentation: **Disabled**

Use EASY-IC™: **False**

Dynamic Retention Time: **Off**

Scan Description: **9me2ph-9me3phac**

Include Start/End Times: **False**

Mass List Table

| Mass List Table | | | | |
| --- | --- | --- | --- | --- |
| Compound | Formula | Adduct | m/z | z |
|  |  |  | 533.2764 | 2 |

Experiment#34 [tMSn]

Start Time (min): **0**

End Time (min): **1**

Master Scan:

tMS² OT HCD

MSⁿ Level (n): **2**

Multiplex Ions: **False**

Isolation Mode: **Quadrupole**

Isolation Window (m/z): **0.7**

Activation Type: **HCD**

HCD Collision Energy (%): **30**

Stepped Collision Energy: **False**

Detector Type: **Orbitrap**

Orbitrap Resolution: **120000**

Mass Range: **Normal**

Scan Range Mode: **Define m/z range**

Scan Range (m/z): **170-1200**

RF Lens (%): **60**

AGC Target: **Custom**

Normalized AGC Target (%): **200**

Maximum Injection Time Mode: **Dynamic**

Desired minimum points across the peak: **6**

Microscans: **1**

Data Type: **Centroid**

Polarity: **Positive**

Source Fragmentation: **Disabled**

Use EASY-IC™: **False**

Dynamic Retention Time: **Off**

Scan Description: **K9a10ph-10phK14a**

Include Start/End Times: **False**

Mass List Table

| Mass List Table | | | | |
| --- | --- | --- | --- | --- |
| Compound | Formula | Adduct | m/z | z |
|  |  |  | 540.266 | 2 |

Experiment#35 [tSIM]

Start Time (min): **0**

End Time (min): **1**

Master Scan:

tSIM

Multiplex Ions: **True**

Maximum Number of Multiplexed Ions: **9**

Define Multiplexing Groups (MSX ID): **User-defined**

Isolation Mode: **Quadrupole**

Isolation Window (m/z): **1.2**

Detector Type: **Orbitrap**

Orbitrap Resolution: **240000**

Mass Range: **Normal**

RF Lens (%): **60**

AGC Target: **Custom**

Normalized AGC Target (%): **200**

Maximum Injection Time Mode: **Dynamic**

Desired minimum points across the peak: **6**

Microscans: **1**

Data Type: **Centroid**

Polarity: **Positive**

Source Fragmentation: **Disabled**

Scan Description: **QC peptide**

Include Start/End Times: **False**

Mass List Table

| Mass List Table | | | | | |
| --- | --- | --- | --- | --- | --- |
| Compound | Formula | Adduct | m/z | z | MSX ID |
| H2BQC_1_28 GVKFR complete and oxidation |  |  | 718.4243 | 1 | 1 |
| H2BQC_1_28 GSTGGKAPR complete |  |  | 443.7406 | 2 | 1 |
| H2BQC_1_28 GKAPATSGMVGPHR complete |  |  | 711.3695 | 2 | 1 |
| H2BQC_1_28 GSTGGKAPR over |  |  | 471.7499 | 2 | 1 |
| H2BQC_1_28 GKAPATSGMVGPHR over |  |  | 739.3787 | 2 | 1 |
| H2BQC_1_28 GVKFRGSTGGKAPR inc digestion |  |  | 793.4438 | 2 | 1 |
| H2BQC_1_28 GSTGGKAPRGKAPATSGMVGPHR inc digestion |  |  | 763.7341 | 2 | 1 |
| H2BQC_1_28 GSTGGK inc derivatization |  |  | 506.257 | 2 | 1 |
| H2BQC_1_28 APATSGMVGPHR inc derivatization |  |  | 590.7983 | 2 | 1 |
